# Supplementary material for: Particle engineering enabled by polyphenol-mediated supramolecular networks
Source: PubMed Central journal article supplement (PMC7511334; doi:10.1038/s41467-020-18589-0), 2020-09-23
Supplement: 41467_2020_18589_MOESM2_ESM.pdf [file 41467_2020_18589_MOESM2_ESM.pdf]

## Description of Additional Supplementary Files

File Name: Supplementary Movie 1

Description: **Assembly process of pBDT and polyphenols in water.** Evolution of the complex formation between pBDT (blue) and CAT (red) molecules in water during ~10 ns of MD simulation.

File Name: Supplementary Movie 2

Description: **Disassembly process of pBDT and polyphenols in DMF.** Evolution of the disassembly in DMF of the complex preformed in water between pBDT (blue) and CAT (red) molecules.
